# Supplementary material
Source: publisher figshare collection journal article supplement (https://rs.figshare.com/ndownloader/files/18006209)
Supplement: Supplementary file 1 [file 18006209]

**Supplemental files for Ju Tang et al. “Pollinator effectiveness and importance between female and male mining bee (*Andrena*)”, MS ID RSBL-2019-0479.R1**

**Table S1**. Comparisons of body size (mean  SE) between female (n  19) and male (n  13) individual beesin *Andrena emeishanica* under a generalized linear model analysis.

|  | Female | Male | Wald 2 | df | *p* |
| --- | --- | --- | --- | --- | --- |
| Antenna length (mm) | 3.55 ± 0.05 | **4.15 ± 0.08** | 48.261 | 1 | **< 0.001** |
| Head length (mm) | **2.80 ± 0.03** | 2.50 ± 0.05 | 37.704 | 1 | **< 0.001** |
| Head width (mm) | **2.46 ± 0.05** | 2.23 ± 0.04 | 10.492 | 1 | **0.001** |
| Tongue length (mm) | 2.30 ± 0.09 | 2.05 ± 0.12 | 2.49 | 1 | 0.115 |
| Thorax length (mm) | **3.27 ± 0.08** | 2.46 ± 0.06 | 59.24 | 1 | **< 0.001** |
| Thorax width (mm) | **2.63 ± 0.04** | 2.14 ± 0.04 | 58.794 | 1 | **< 0.001** |
| Abdomen length (mm) | **4.91 ± 0.06** | 4.23 ± 0.09 | 45.959 | 1 | **< 0.001** |
| Abdomen width (mm) | **2.88 ± 0.04** | 2.23 ± 0.04 | 111.263 | 1 | **< 0.001** |
| Body length (mm) | **9.83 ± 0.11** | 8.37 ± 0.07 | 99.03 | 1 | **< 0.001** |
| Tibia length (mm) | **2.13 ± 0.03** | 1.69 ± 0.03 | 123.83 | 1 | **< 0.001** |
| Tibia width (mm) | **0.45 ± 0.02** | 0.26 ± 0.01 | 60.942 | 1 | **< 0.001** |
| Hair length (mm) | **0.68 ± 0.03** | 0.27 ± 0.01 | 193.874 | 1 | **< 0.001** |
| Hair no./100m2 | **3.6 ± 0.1** | 2.6 ± 0.1 | 71.006 | 1 | **< 0.001** |
| Body weight (mg) | **12.16 ± 0.68** | 4.91 ± 0.25 | 70.099 | 1 | **< 0.001** |
